# Supplementary material for: Relationship between fatigue symptoms and subjective and objective indicators in hemodialysis patients
Source: Springer Nature journal article supplement (doi:10.1007/s11255-018-1871-4), 2018-05-04
Supplement: MOESM1 [file 15739546]

**Supplementary file 1** Multicollinearity examinations using anxiety as a dependent variable

| Model | | Collinearity Statistics | |
| --- | --- | --- | --- |
| Tolerance | VIF |
| Anxiety as a dependent variable | Ethnicity | 0.586 | 1.705 |
| Marriage status | 0.869 | 1.151 |
| Employment | 0.732 | 1.366 |
| Education | 0.548 | 1.823 |
| Family income (RMB/month) | 0.614 | 1.628 |
| Medical expense payment method | 0.532 | 1.881 |
| Exercise | 0.505 | 1.981 |
| Exercise time | 0.452 | 2.213 |
| Complication | 0.489 | 2.043 |
| Hypotension | 0.659 | 1.518 |
| Cramping | 0.603 | 1.658 |
| Nausea | 0.406 | 2.460 |
| Vomiting | 0.402 | 2.487 |
| Headache | 0.712 | 1.405 |
| Hypoglycemia | 0.731 | 1.367 |
| Chest tightness | 0.583 | 1.714 |
| Shortness of breath | 0.717 | 1.394 |
| Pain (whole-body pain) | 0.815 | 1.228 |
| Itching | 0.853 | 1.173 |
| Appetite | 0.660 | 1.516 |
| Dialysis frequency (times/week) | 0.864 | 1.158 |
| Depression | 0.137 | 7.298 |
| PSSS | 0.596 | 1.677 |
| Intrafamilial support | 0.691 | 1.448 |
| Self-management behavior | 0.262 | 3.810 |
| PTH (pg/mL) | 0.576 | 1.735 |
| ALB (g/L) | 0.788 | 1.268 |
| Ca (mmol/L) | 0.775 | 1.291 |
| Fe (µmol/L) | 0.523 | 1.912 |
| SF (µg/L) | 0.833 | 1.201 |
| TSAT | 0.553 | 1.809 |
| Urea (mmol/L) | 0.870 | 1.149 |
| SF-36 vitality score | 0.454 | 2.201 |
| Sleep disorder | 0.577 | 1.734 |
| *VIF* variance inflation factor, *PTH* parathyroid hormone, *ALB* albumin, *Ca* calcium, *Fe* ferritin, *SF* serum ferritin, *TSAT* serum transferrin saturation, *SF-36* 36-Item Short Form Health Scale | | | |
